# Supplementary material for: Functional conservation and divergence of the helix‐turn‐helix motif of E2 ubiquitin‐conjugating enzymes
Source: PubMed Central journal article supplement — EMBO J. 2021 Dec 23;41(3):e108823. doi: 10.15252/embj.2021108823 (PMC8804933; doi:10.15252/embj.2021108823), 2021-12-23
Supplement: EMBJ-41-e108823-s001.pdf [file EMBJ-41-e108823-s001.pdf]

## Expanded View Figures

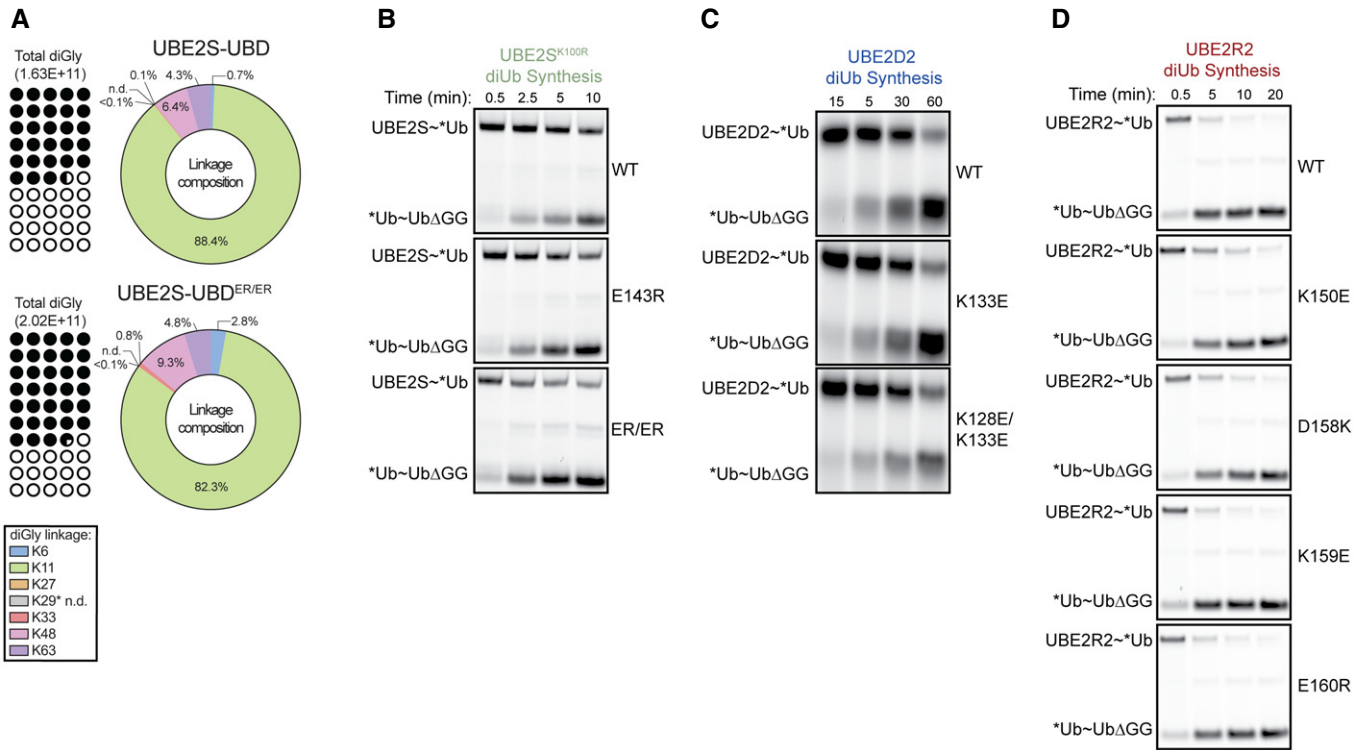

**Figure EV1. Charge-swaps at the E2<sup>HTH</sup> impact activity across several E2 family members.**

- A A Mass spectrometry analysis of Ub linkages from chain elongation reactions performed by UBE2S-UBD WT and ER/ER (related to Fig 1D and E, and Appendix Fig S1C).
- B–D Fluorescent scans monitoring the diUb production by UBE2S (B), UBE2D2 (C), and UBE2R2 (D) WT and charge-swapped variants. The UBE2S, UBE2D2, and UBE2R2 WT panels used in Fig 2E,G,H are shown for comparison.

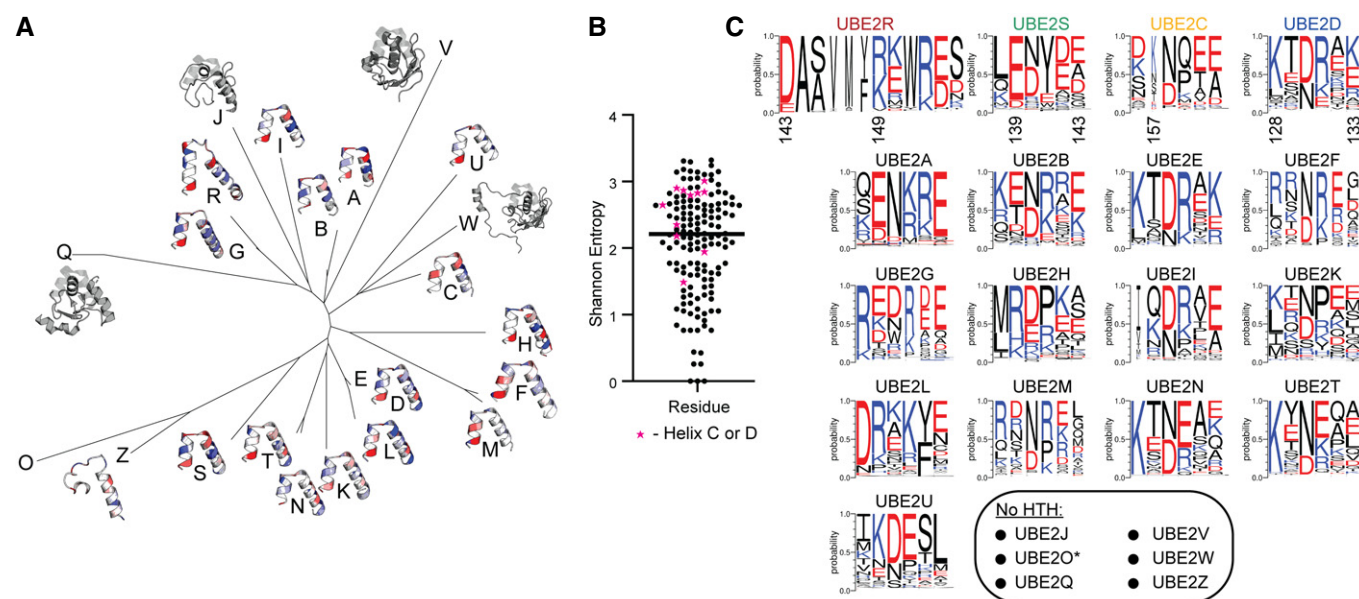

**Figure EV2. The HTH is a variable region across E2 family members but retains some charge conservation for individual E2s.**

- A Maximum likelihood phylogenetic tree of the E2 family, including charge conservation models at the E2<sup>HTH</sup>.
- B Shannon entropy plot of residue conservation across the E2 family. The majority of residues in the E2<sup>HTH</sup> (pink stars) have increased Shannon entropy compared to the E2 mean represented by the horizontal line.
- C Weblogs of E2<sup>HTH</sup> residue conservation for each E2 family member. UBE2S, UBE2C, UBE2D, and UBE2R are repeated from Fig 2I for comparison.

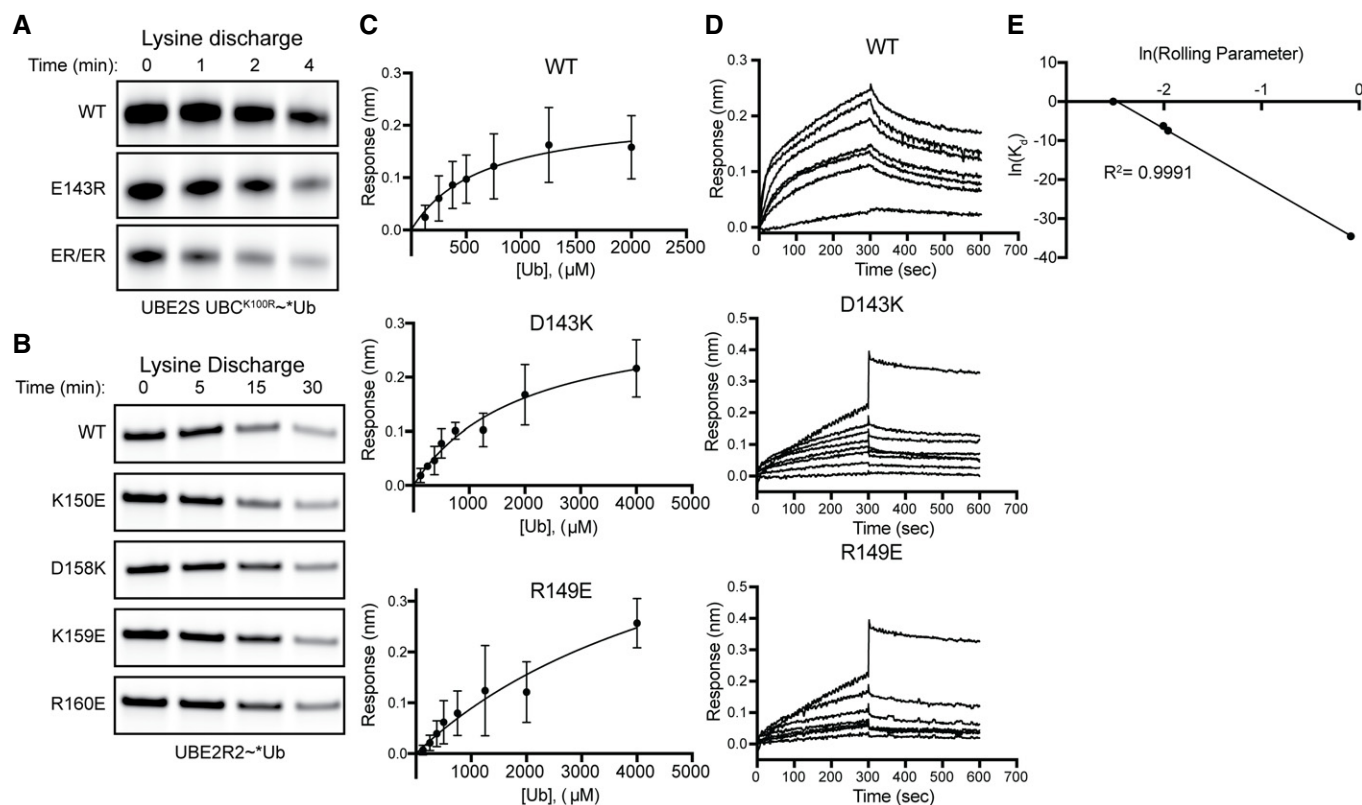

**Figure EV3. UBE2R2<sup>HTH</sup> facilitates acceptor Ub binding for diUb synthesis.**

- A Fluorescent scan of the lysine discharge assay monitoring the stability of the UBE2S~\*Ub. The panel of the UBE2S WT from Fig 3C is shown for comparison.
- B Fluorescent scans monitoring UBE2R2~\*Ub in lysine discharge assays. UBE2R2 WT panel from Fig 3D is shown for comparison.
- C Equilibrium data fitting of Ub titrations in BLI experiments to detect interactions between Ub and immobilized UBE2R2 variants. Mean data points of  $n \geq 3$  independent, technical replicates are shown. Error bars: SD.
- D Corresponding raw BLI traces used for equilibrium data fitting in (C).
- E Fitting of the METRIS roll parameter data from BLI data.

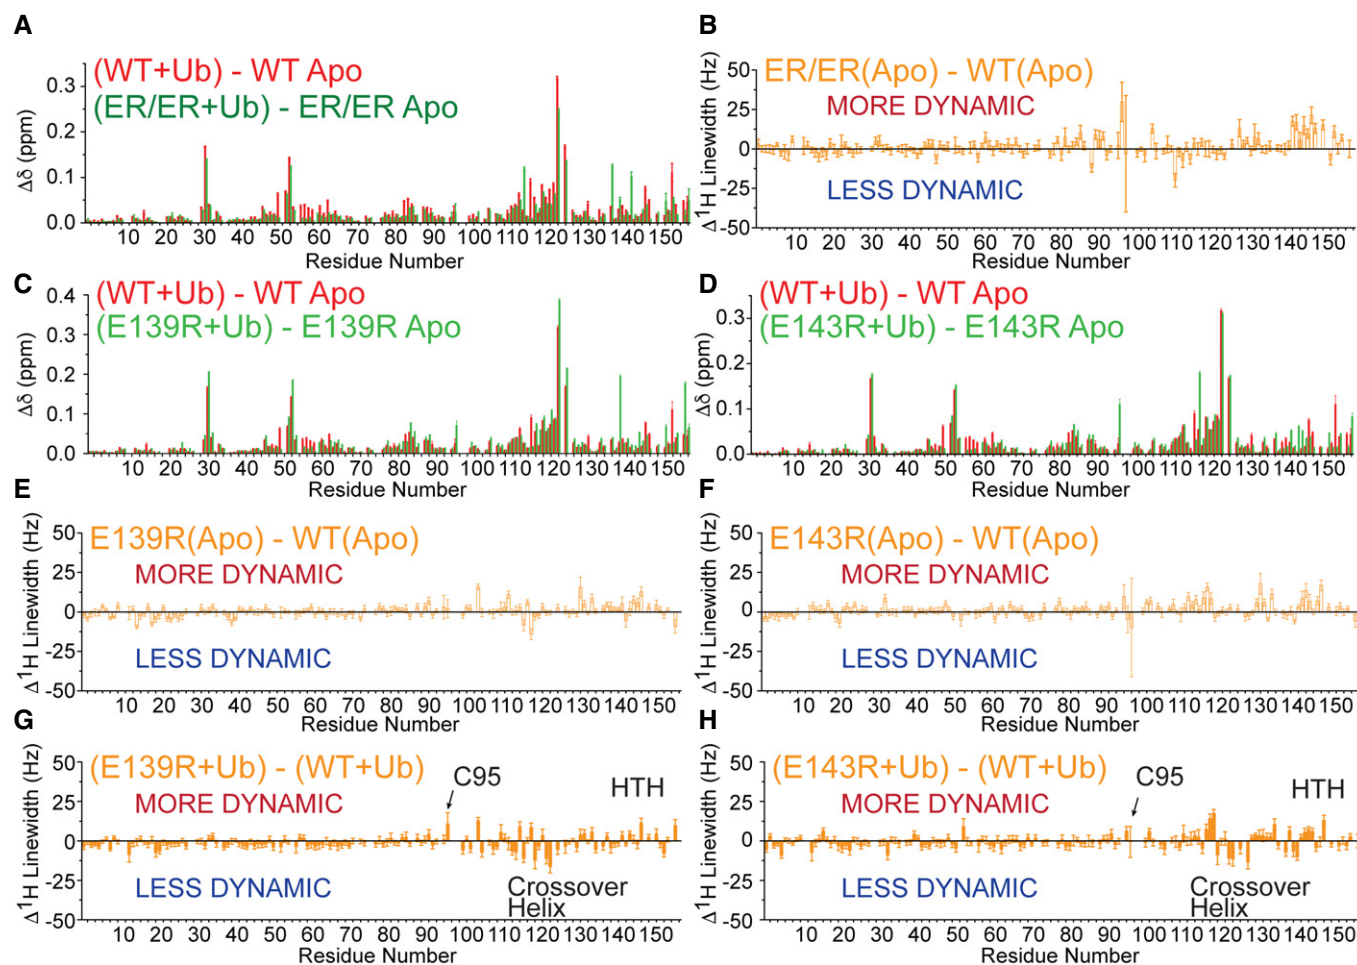

**Figure EV4. NMR analysis of UBE2S and its variants binding to Ub.**

- A NMR chemical-shift perturbations due to the binding of Ub to either UBE2S WT or the ER/ER variant.  
 B NMR  $^1\text{H}$  linewidth comparisons of apo (no Ub) UBE2S WT and ER/ER variant.  
 C, D NMR chemical-shift perturbations due to the binding of Ub to either UBE2S WT or the E139R variant (C) or E143R variant (D).  
 E, F NMR  $^1\text{H}$  linewidth comparisons of apo UBE2S WT and E139R (E) or E143R variant (F).  
 G, H NMR  $^1\text{H}$  linewidth comparisons of UBE2S WT and E139R (G) or E143R (H) variant when Ub is added.

Data information: (A–H) Shown are the best-fit values and standard deviations (SD) estimated from the covariance matrix analysis of NMR spectra with  $n = 2048$  measurement points for 16 ppm in the  $^1\text{H}$  dimension.

**Figure EV5. APC2 competes with the donor Ub to bind to the UBE2S<sup>HTH</sup>.**

- A Structure of UBE2C bound to the APC11 RING and APC2 WHB (PDB: 5L9U; Brown *et al*, 2016), demonstrating that the UBE2C<sup>HTH</sup> is not interacting with the APC/C.  
 B Representative fluorescent scan (left) and its quantification (right) monitoring CycB\* ubiquitination by APC/C and either UBE2C WT or K157E. Data were statistically analyzed using an unpaired Welch's  $t$ -test ( $*P \leq 0.05$ ,  $n = 4$  independent, technical replicates). Error bars: SEM. Data normalized to the unmodified substrate band from reactions lacking an E2.  
 C Quantification of Fig 6E monitoring the polyubiquitination of Ub-CycB\* by a panel of UBE2S<sup>HTH</sup> charge-swap variants. Data were statistically analyzed by one-way ANOVA ( $*P \leq 0.05$ ,  $****P \leq 0.0001$ ,  $n = 3$  independent, technical replicates). Error bars: SEM. Data normalized to the unmodified substrate band from reactions lacking an E2.  
 D, E Fluorescent scan (D) and its quantification (E) monitoring APC/C-dependent Ub-Securin (Ub-Sec\*) ubiquitination utilizing the panel of UBE2S variants (related to Fig 6E). Data were statistically analyzed by one-way ANOVA ( $n = 3$  independent, technical replicates). Error bars: SEM. Data normalized to the unmodified substrate band from reactions lacking an E2.

Source data are available online for this figure.

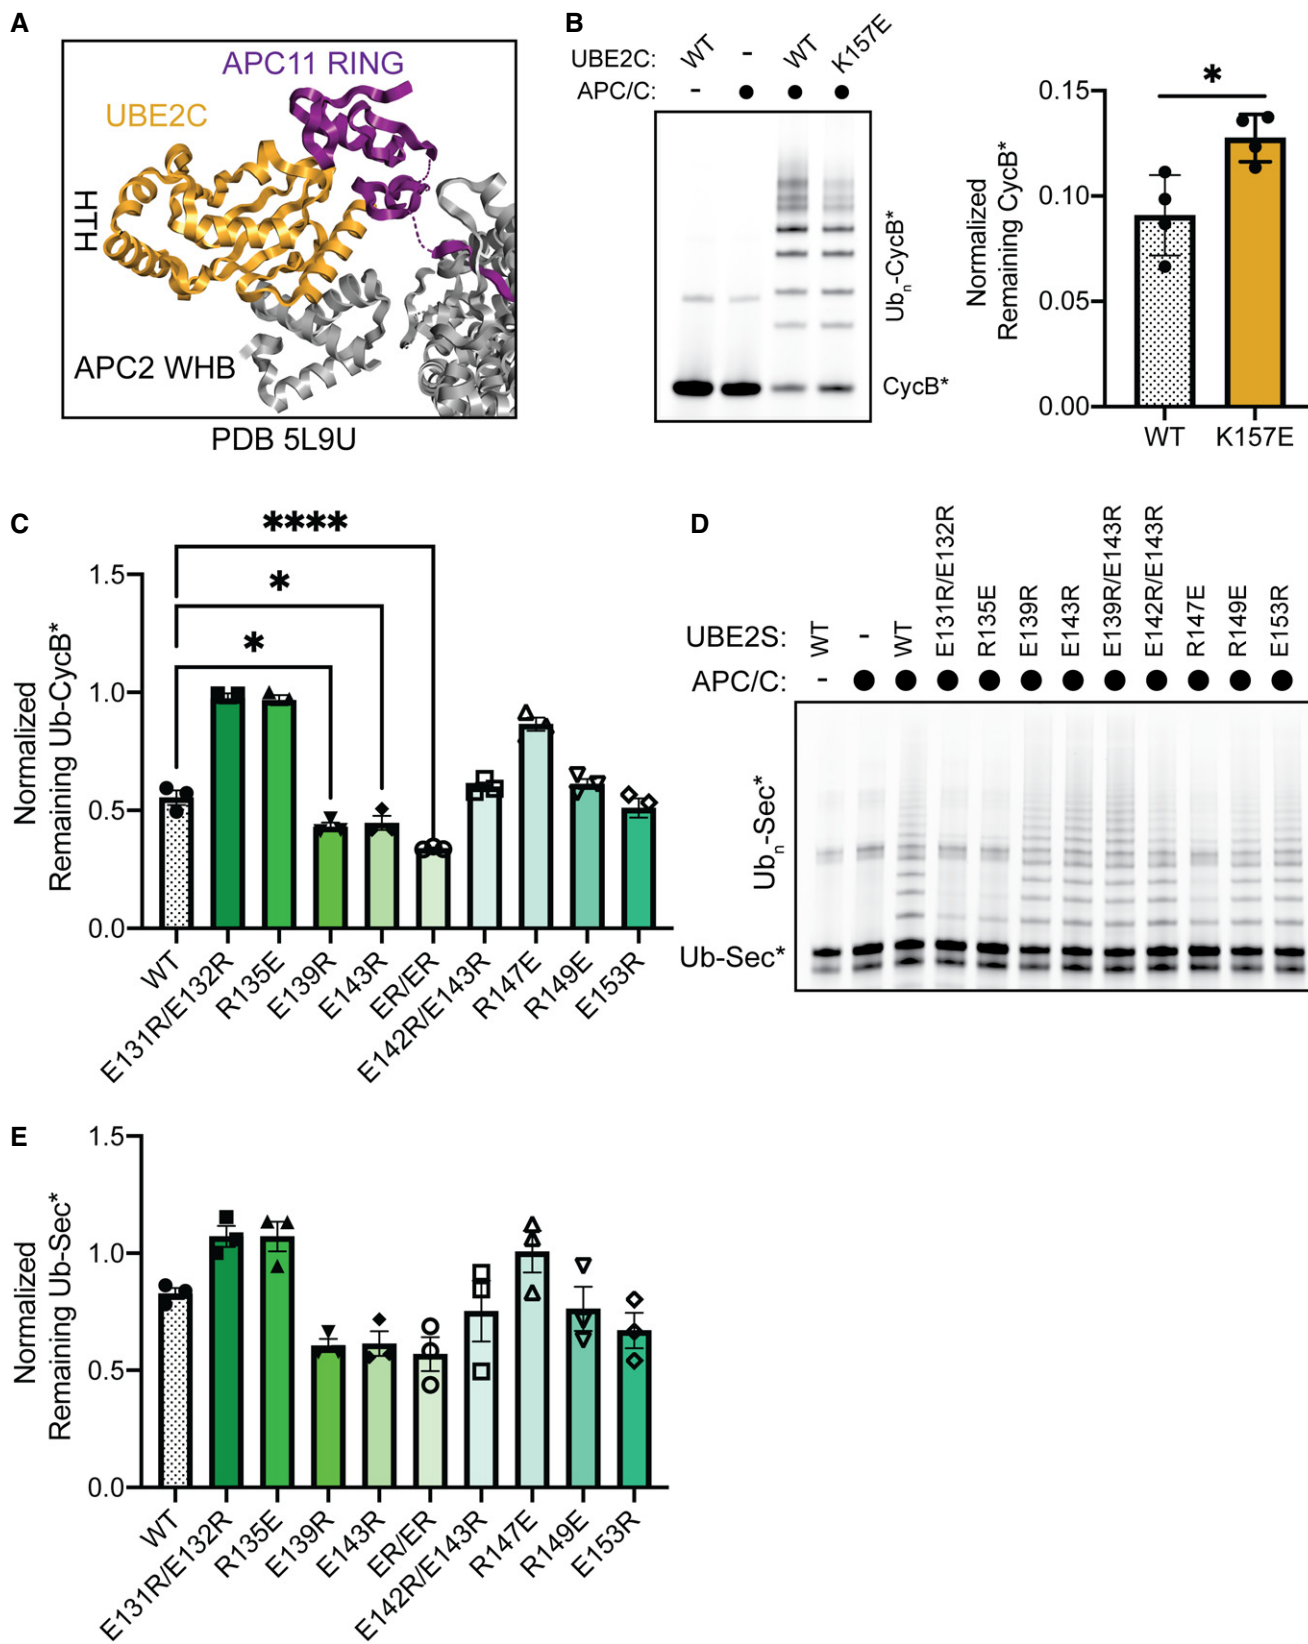

Figure EV5.
